# Supplementary material for: Paleoamerican exploitation of extinct megafauna revealed through immunological blood residue and microwear analysis, North and South Carolina, USA
Source: PubMed Central journal article supplement (PMC10257692; doi:10.1038/s41598-023-36617-z), 2023-06-10
Supplement: 41598_2023_36617_MOESM1_ESM.pdf [file 41598_2023_36617_MOESM1_ESM.pdf]

# **Supplementary Information: Paleoamerican Exploitation of Extinct Megafauna Revealed through Immunological Blood Residue and Microwear Analysis, North and South Carolina, USA**

Christopher R. Moore,<sup>1,2\*</sup> Larry R. Kimball,<sup>3</sup> Albert C. Goodyear,<sup>2</sup> Mark J. Brooks,<sup>2</sup>  
I. Randolph Daniel, Jr.,<sup>4</sup> Allen West,<sup>5</sup> Sean G. Taylor,<sup>1</sup> Kiersten J. Weber,<sup>1</sup> John L. Fagan,<sup>6</sup>  
and Cam M. Walker<sup>7</sup>

<sup>1</sup>South Carolina Department of Natural Resources (SCDNR) Heritage Trust Program, Land, Water and Conservation Division, South Carolina Department of Natural Resources, PO Box 167, Columbia, SC 29202, USA, 919-218-0755. \*[MOORECR@mailbox.sc.edu](mailto:MOORECR@mailbox.sc.edu); 803-238-1354. [taylor@dnr.sc.gov](mailto:taylor@dnr.sc.gov); 803-261-4582. [weberk@dnr.sc.gov](mailto:weberk@dnr.sc.gov). <sup>2</sup>South Carolina Institute for Archaeology and Anthropology, University of South Carolina 1321 Pendleton Street Columbia, SC 29208, USA, 919-218-0755. \*[MOORECR@mailbox.sc.edu](mailto:MOORECR@mailbox.sc.edu); 803-237-7601; [goodyear@mailbox.sc.edu](mailto:goodyear@mailbox.sc.edu). 803-422-8251. [mjbrooks@mailbox.sc.edu](mailto:mjbrooks@mailbox.sc.edu). <sup>3</sup>Department of Anthropology, Appalachian State University, Boone, NC 28608, USA, 828-406-0218. [kimballlr@appstate.edu](mailto:kimballlr@appstate.edu). <sup>4</sup>Department of Anthropology, East Carolina University, Greenville, NC 27858, USA, 252-328-9455. [danieli@ecu.edu](mailto:danieli@ecu.edu). <sup>5</sup>Comet Research Group, Prescott, AZ USA, 928-632-7738. [allen7633@aol.com](mailto:allen7633@aol.com). <sup>6</sup>Archaeological Investigations Northwest, 3510 N.E. 122<sup>nd</sup> Ave., Portland, OR 97230, USA, [john@ainw.com](mailto:john@ainw.com). 503-761-6605. <sup>7</sup>WWAMI Medical Education Program, University of Wyoming, Dept. 4238 Health Sciences Bldg., Rm. 445E, 1000 E. University Avenue Laramie, WY 82071, USA, 307-766-6751. [Cam.Walker@uwyo.edu](mailto:Cam.Walker@uwyo.edu).

\*To whom correspondence should be addressed. E-mail: [MOORECR@mailbox.sc.edu](mailto:MOORECR@mailbox.sc.edu)

## Blood Residue Analysis

*Blood Protein Residues.* Blood is composed of red and white blood cells and serum, which is composed of about 150 different proteins including albumin, alpha, and beta globulins. Immunoglobulins are large, Y-shaped proteins with antigen-binding sites located on the V portion of the Y. There are several immunoglobulin molecules of different weights, sizes, and functions. The most common type (and the most pertinent for CIEP) is immunoglobulin G (IgG). Other less common varieties are immunoglobulin A (IgA), immunoglobulin D (IgD), immunoglobulin E (IgE), and immunoglobulin M (IgM). Some of these proteins can survive in the environment in a nonfunctional but immunologically identifiable form for long periods by forming a “covalently cross-linked proteinaceous mass with a high molecular weight” (Marlar *et al.*<sup>1</sup>:30). This combination of protein, fatty tissues, and soil particles is resistant to microbes and is markedly insoluble in water. It seems probable that the porosity and surface roughness of the artifact also aids in the preservation of protein residues. Experiments by AINW and others have identified blood residues from mammoth, bison, musk ox, horse, caribou, bear, duck, and trout on Paleoindian artifacts that may be as old as 11,500 years (Forgeng<sup>2</sup>; Loy and Dixon<sup>3</sup>; Williams<sup>4</sup>). Other studies suggest that protein residues can survive in recognizable form for as long as 40,000 years (Prager *et al.*<sup>5</sup>).

Artifacts can be examined under a binocular microscope (at around 240x maximum magnification) to identify probable residues, as well as cells, hair, and other tissues. Microscopic examination is not always effective as a screening technique as CIEP can still detect otherwise invisible residues. A common medical test for occult blood is sometimes effective when used to screen the extracted residue solution. However, the CEIP technique can detect residues in more dilute concentrations than is possible with the commonly available occult blood test.

*The Immune Reaction.* Immunological forensic tests owe their effectiveness to the antigen-antibody reaction, which allows very specific recognition and identification. Essentially, any molecule that can bind to an antibody is an antigen. For archaeological purposes, the antigen is an unknown protein adhering to an artifact after its use. Antigens are foreign proteins that, when introduced into the bloodstream of an animal, stimulate the immune system of the animal to produce antibodies (most commonly IgG protein molecules) with specific binding sites that match corresponding sites on the foreign antigen. Polyclonal antibodies, which bind to multiple

sites on the antigen and therefore have a high rate of successful matching to unknown proteins, are the most commonly used reactants in CIEP. The meeting of antigen and antibody forms a very strong bond between the two proteins. The visible line formed in a positive CIEP reaction occurs when an antigen with multiple binding sites matches a group of polyclonal antibodies, binds with them, and causes the proteins to precipitate out of solution (Marlar *et al.*<sup>1</sup>:28).

*Antisera.* The antisera used in AINW's CIEP analysis are obtained from commercial laboratories (Supplementary Table 1). A forensic antiserum is made by injecting a host animal, typically a goat or rabbit, with a protein solution obtained from another animal. The immune system of the host animal produces antibodies (mainly IgG) in reaction to the foreign antigen. Blood serum drawn from the host animal is purified and tested to determine the range of reactivity of the antiserum. The purified antiserum is then freeze-dried for storage and shipment. After receipt of a new lot of antiserum, the AINW laboratory routinely tests each antiserum against representative specimens from up to 32 different animal species.

Ancient protein residues are often difficult to extract from the artifacts that have preserved them. The AINW Residue Analysis Laboratory uses a 5% ammonia solution, which has been used for similar applications in forensic medicine (Dorrill and Whitehead<sup>6</sup>; Kind and Cleavelly<sup>7</sup>). Ammonia is generally more effective in lifting old and partially denatured blood proteins than other solvents (Newman<sup>8</sup>). A small amount of the ammonia solution is applied to the artifact in a plastic tray, and the tray and artifact are placed in an ultrasonic bath (Branson 2200) for 30 minutes or longer. The artifact in solution is then placed on a mechanical rotator (Thermolyne Rotomix) for an additional ten minutes.

Artifacts too large for ultrasonic extraction may be placed on the rotator for 30 minutes or longer. Residues from soil samples can also be extracted using variations of these methods. The extraction solution is then drawn off and stored in an airtight microcentrifuge tube. The extracts are centrifuged to clarify the sample and refrigerated; the CIEP test is run as soon as possible after extraction. The extracts may be frozen immediately if testing is to be delayed for more than one week.

AINW's CIEP method uses an agarose gel as a substrate. Standard analysis procedures begin with extracting residues from the artifacts with a 5% ammonia solution. The artifact

extracts are then placed singly into gels and tested against the antisera selected for these tests with the CIEP technique. In addition to the artifact extracts, positive and negative control sera are run with each gel. This is done to determine if there are any contaminants or extraneous proteins that may give false positive results. If an anomalous result such as an extract reacting with multiple antisera or to a negative control serum is obtained, the extract solution is mixed with an equal volume of a 1% solution of a non-ionic detergent to increase chemical bonding specificity and is run through the CIEP process again. If a reaction still occurs after the addition of the non-ionic detergent, any reactions of those specimens to the antisera are discounted. Experiments at AINW have implicated plant pitch used in hafting prehistoric stone tools as a possible cause of some cross or non-specific reactions. Electrophoresis is used to drive the antigens and antibodies together. The gel substrates are placed in acrylic electrophoresis tanks filled with barbital buffer solution, then attached to the regulated H.V. power source. The antibodies move toward the cathode because of the overall negative charge on the molecule, while the antigens move toward the anode. A precipitate is formed where the proteins meet and bond in the area between the wells, visible as a white line or arc (Culliford<sup>9</sup>). The gel is soaked overnight in saline to stabilize the reaction, then dried and stained with a standard protein stain as a permanent record of the CIEP results. The dried and stained gel is then backlit on a light table, and examined under magnification for the presence of precipitate lines, indicating positive reactions. After testing, the extracts are frozen and stored for one year in case additional testing is requested.

### **Background on Non-Clovis Paleoamerican Points**

*Haw River.* Unidentified small lanceolates (USLs) have been noted in many areas of the Southeast for a number of years as representing something different than Clovis but likely of early Paleoamerican age (Supplementary Figure 4). In South Carolina, what we now refer to as Haw River points were initially called “Heart Points” by Tommy Charles during years of documenting private collections across the state (Charles and Moore<sup>10</sup>). In North Carolina, a morphologically similar point called the Hardaway Blade type was recognized by Coe<sup>11</sup> at the base of the Hardaway Site. Following Goodyear<sup>12</sup>, Daniel<sup>13</sup> suggests some Hardaway Blades are likely Hardaway Dalton preforms but other such bifaces appear to be finished points and may be a separate unknown point type that could predate both Hardaway Dalton and Clovis. In South Carolina, Haw River points made of Coastal Plain Chert (CPC) are excessively weathered, even

when compared to Clovis points of the same material, and provide some support for a very early Paleoamerican affiliation for this point type. Both Meadowcroft and Cactus Hill have similar small lanceolate points with claims for pre-Clovis affiliation (Adovasio<sup>14</sup>; McAvoy and McAvoy<sup>15</sup>). At the present time “Haw Rivers” have only a morphological point status but they are widely recognized along the East Coast and are presented as a possible type in several publications for sites in Virginia, North Carolina, South Carolina, and Georgia (Painter<sup>16,17</sup>; Gingerich and Childress<sup>18</sup>; Charles and Moore<sup>10</sup>; Whatley and Arena<sup>19</sup>). Thus, they are recognizable by some archaeologists in multiple states and are technologically distinct from Clovis. Associated chronometric dates for this point type do not yet exist and excavations with Haw River points in a clear stratigraphic context are needed to resolve the chronostratigraphic position of this point type relative to other Paleoamerican types.

*Redstone.* Redstone points have characteristic deeply concave bases, triangular blade margins, and long flutes that can extend, in some cases, to near the distal end of the point. Goodyear<sup>20</sup> has argued that fluting these points is instrument-assisted. Redstone points in North and South Carolina are similar to those from elsewhere in the mid-South (Cambron and Hulse<sup>21</sup>). A post-Clovis affiliation for Redstone points has been assumed based on point morphology that closely resembles both Folsom and Gainey points. In her chapter in the Smallwood and Jennings<sup>22</sup> edited volume, Julie Morrow declares that Redstones are in reality Gainey points (Morrow<sup>23</sup>). “Although first described from examples in Alabama (Cambron and Hulse<sup>21</sup>), Redstone Points have a broad distribution across the Midsouth. Other than Tennessee (Broster and Norton<sup>24</sup>), they occur in South Carolina, Virginia, and North Carolina and are equated with other fully fluted points like Folsom, Gainey, and Cumberland (Goodyear<sup>25</sup>). Redstones are Gainey points that occur in the Southeast” (Morrow<sup>23</sup>). Goodyear<sup>25</sup> speculates that the elongated trianguloid blade could be an adaptation to hunting elk and bison after the extinction of Proboscideans. Until very recently, Redstone points lacked any associated chronometric dates. However, at Cactus Hill, wood charcoal was dated from associated hearths with *in-situ* deeply concave base (DCB) fluted points (i.e., Redstone) and provided <sup>14</sup>C dates that range from ca. 10.9 to 10.8 BP (McAvoy and McAvoy<sup>26</sup>: Table 5.8). This puts Redstone at the tail end of Clovis with a range that likely extends for a yet unknown

amount of time earlier and later. More dating is needed to constrain the timing and usage of this type.

*Cumberland.* Like Redstone points, Cumberland points are full-facial fluted with one or multiple flutes on each face, are basally ground, and often are slightly waisted with distinct ears and a shallower basal concavity than Redstone (Daniel<sup>13</sup>; Cambron and Hulse<sup>21</sup>). Based on morphology, Cumberland points are presumed to fall into the Middle Paleoindian time frame with other similar full-fluted and waisted points (Tune<sup>27</sup>). As of this writing, no associated radiocarbon dates exist for Cumberland.

*Simpson.* Simpson points are common in Florida and the Georgia Coastal Plain, but a small number can be found in the Carolinas. This type was described by Bullen<sup>28</sup> as: “A wide-bladed, relatively narrow-waisted, fairly thin, concave based, medium to large sized point with grinding on the bottom and waisted edges. Basal ears are present but are not as developed as in the Suwannee point. Basal thinning is present but, also, is not well developed. Workmanship is good to fair.” Simpson points differ from Suwannee points because of their extremely waisted appearance and lack of well-developed ears.” Meeks and Anderson<sup>29</sup> place Simpson points in the Middle Paleoindian time frame between 12,600 and 12,000 cal. BP; however, as of the writing of this paper, no chronometric dates exist for this point type and Dunbar<sup>30</sup> considers at least some Simpson variants to potentially pre-date Clovis in Florida.

*Beaver Lake.* As described by Cambron and Hulse<sup>21</sup> and DeJarnette *et al.*<sup>31</sup>, this is a medium-sized, auriculated point with recurvate blade edges. DeJarnette *et al.*<sup>31</sup> wrote, “the cross-section is usually biconvex, but one or both faces may be median ridged. The blade is recurvate-constricted in the hafting area and above the auricles. The distal end is usually acute. The auriculated hafting area is expanded-rounded. The basal edge is usually thinned and incurvate but may be straight. The hafting constriction and basal edge are usually ground.” The shallow random flaking is usually employed to shape the faces and sometimes produces a median ridge. Secondary retouch flake scars are usually long, evenly spaced, and struck off on alternate faces, resulting in an irregular pattern along the blade edges. This retouch appears to have been accomplished with indirect percussion or pressure flaking.”

DeJarnette *et al.*<sup>31</sup> wrote, “the type was named for the Beaver Lake area in Limestone County, Alabama. The type has been called Unfluted Cumberland in several papers, especially Soday and Cambron<sup>32</sup>. All evidence indicates the type dates from 10,000 B.P. to an unknown earlier time. It is considered to be a transitional Paleo-Indian type”. DeJarnette, Kurjack, Cambron, and Hulse named the point in 1962 for examples that were recovered from the Stanfield-Whorley Bluff Shelter, Colbert County, Alabama. Like other waisted lanceolates, this type is assumed to fit within the Middle Paleoindian time frame but as with other Paleoamerican points found in the Southeast, chronometric dates for this type do not yet exist.

## Supplementary Tables

Supplementary Table 1. Antiserum chart for Archaeological Investigations Northwest, Inc.

| COMPANY                 | ANTISERUM          | HOST                             | REACTS WITH                                                                          |
|-------------------------|--------------------|----------------------------------|--------------------------------------------------------------------------------------|
| BLI*                    | BIRD               | goat                             | Class Aves: dove, duck, sparrow, chicken, ostrich, emu, goose, macaw                 |
|                         | BOTTLENOSE DOLPHIN | rabbit                           | Family Delphinidae: dolphins, less strongly with porpoises and toothed whales        |
|                         | FERRET             | rabbit                           | Family Mustelidae: ferret, otter, badger, mink, stoat, wolverine, marten             |
|                         | SHEEP              | rabbit                           | Genus Ovis: domestic sheep, bighorn sheep                                            |
|                         | WHITE WHALE        | rabbit                           | Family Monodontidae: belugas and narwhals, porpoises                                 |
| BYT*                    | DUCK               | rabbit                           | Family Anatidae: swans, geese and ducks                                              |
| CBI*                    | TROUT              | rabbit                           | Subfamily Salmoninae: salmon, steelhead, rainbow trout, char                         |
| MP*                     | BOVINE             | rabbit                           | Family Bovidae: domestic cow, bison                                                  |
|                         | CAT                | goat                             | Family Felidae: cat, mountain lion, lynx, bobcat                                     |
|                         | CHICKEN            | rabbit                           | Order Galliformes, Order Anseriformes, Order Columbiformes                           |
|                         | DEER               | goat                             | Family Cervidae: white-tail and mule deer, elk, moose, caribou                       |
|                         | DOG                | rabbit                           | Family Canidae: domestic dog, coyote, wolf, fox                                      |
|                         | GOAT               | rabbit                           | Bovid Subfamilies Bovinae and Caprinae, less strongly with cervids                   |
|                         | GUINEA PIG         | goat                             | Order Rodentia: guinea pig, porcupine, beaver                                        |
|                         | HORSE              | goat                             | Family Equidae: horse, donkey, mule, extinct equids                                  |
|                         | HUMAN              | goat                             | Order Primates: humans, apes, monkeys                                                |
|                         | MOUSE              | goat                             | Order Rodentia: mice, rats                                                           |
|                         | RABBIT             | goat                             | Family Leporidae: rabbit, jackrabbit                                                 |
|                         | RAT                | goat                             | Order Rodentia: rats, mice, squirrels                                                |
| SWINE (PIG)             | goat               | Family Suidae: pig, hog, warthog |                                                                                      |
| NIL*                    | PIGEON             | rabbit                           | Order Columbiformes: pigeons, doves                                                  |
| Triple J Farms (custom) | BEAR               | goat                             | Family Ursidae: black bear, brown bear, grizzly                                      |
|                         | CAMEL              | goat                             | Order Artiodactyla: camelids, bovids, cervids, antilocaprids                         |
|                         | HIPPO              | goat                             | Family Hippopotamidae: extant and extinct hippo species                              |
|                         | OSTRICH            | goat                             | Family Struthionidae: extant and extinct ostrich species                             |
|                         | RHINO              | goat                             | Family Rhinocerotidae: white, black, Indian, Javan, Sumatran, and extinct rhinoceros |
|                         | ELEPHANT           | goat                             | Asian and African elephants and extant and extinct members of Order Proboscidea      |

\*Notes: BLI = Bethyl Laboratories, Inc., BYT = Biorbyt Laboratories, Inc., CBI = Cocalico Biologicals, Inc., IR = Innovative Research, Inc., MP = MP Biomedicals, LLC, NIL = Nordic Immunological Laboratories



**Supplementary Table 2.** Information on artifact context and ownership.

| Analysis ID | Artifact ID     | Type                | Context   | Owner/Curator         | Type                         |
|-------------|-----------------|---------------------|-----------|-----------------------|------------------------------|
| 1           | JC 8            | Clovis              | Surface   | Hampton County Museum | Museum                       |
| 2           | JC 7            | Clovis              | Surface   | Hampton County Museum | Museum                       |
| 3           | JC 418          | Simpson             | Surface   | Hampton County Museum | Museum                       |
| 4           | JC 415          | Clovis              | Surface   | Hampton County Museum | Museum                       |
| 5           | JC 425          | Clovis              | Surface   | Hampton County Museum | Museum                       |
| 6           | JC 9            | Clovis              | Surface   | Hampton County Museum | Museum                       |
| 7           | JC 423          | Clovis              | Surface   | Hampton County Museum | Museum                       |
| 8           | JC 420          | Haw River           | Surface   | Hampton County Museum | Museum                       |
| 9           | JC 6            | Redstone            | Surface   | Hampton County Museum | Museum                       |
| 10          | JC 10           | Clovis              | Surface   | Hampton County Museum | Museum                       |
| 11          | —               | Clovis              | Surface   | Hampton County Museum | Museum                       |
| 12          | JC 417          | Clovis              | Surface   | Hampton County Museum | Museum                       |
| 13          | JC 419          | Haw River           | Surface   | Hampton County Museum | Museum                       |
| 14          | JC 422          | Haw River           | Surface   | Hampton County Museum | Museum                       |
| 15          | JC 408          | Haw River           | Surface   | Hampton County Museum | Museum                       |
| 16          | JC 407          | Haw River           | Surface   | Hampton County Museum | Museum                       |
| 17          | JC 411          | Haw River           | Surface   | Hampton County Museum | Museum                       |
| 18          | JC 406          | Haw River           | Surface   | Hampton County Museum | Museum                       |
| 19          | JC 400          | Haw River           | Surface   | Hampton County Museum | Museum                       |
| 20          | JC 404          | Haw River           | Surface   | Hampton County Museum | Museum                       |
| 21          | JC 410          | Haw River           | Surface   | Hampton County Museum | Museum                       |
| 22          | JC 402          | Haw River           | Surface   | Hampton County Museum | Museum                       |
| 23          | JC 413          | Haw River           | Surface   | Hampton County Museum | Museum                       |
| 24          | JC 401          | Haw River           | Surface   | Hampton County Museum | Museum                       |
| 25          | JC 403          | Haw River           | Surface   | Hampton County Museum | Museum                       |
| 26          | JC 405          | Haw River           | Surface   | Hampton County Museum | Museum                       |
| 27          | 38LX531a        | Clovis              | Excavated | Dominion Energy       | Company                      |
| 28          | 38LX531b        | Clovis Side Scraper | Excavated | Dominion Energy       | Company                      |
| 29          | 38LX531c        | Clovis End Scraper  | Excavated | Dominion Energy       | Company                      |
| 30          | SC680           | Clovis              | Surface   | SCIAA/SEPAS           | University of South Carolina |
| 31          | SC682           | Clovis              | Surface   | SCIAA/SEPAS           | University of South Carolina |
| 32          | SC679           | Clovis              | Surface   | SCIAA/SEPAS           | University of South Carolina |
| 33          | SC358           | Clovis              | Surface   | SCIAA/SEPAS           | University of South Carolina |
| 34          | SC681           | Clovis              | Surface   | SCIAA/SEPAS           | University of South Carolina |
| 35          | SC547           | Clovis              | Surface   | SCIAA/SEPAS           | University of South Carolina |
| 36          | SC670           | Clovis              | Surface   | SCIAA/SEPAS           | University of South Carolina |
| 37          | SC766           | Clovis              | Surface   | SCIAA/SEPAS           | University of South Carolina |
| 38          | SC215           | Redstone            | Surface   | SCIAA/SEPAS           | University of South Carolina |
| 39          | SC488           | Clovis              | Surface   | SCIAA/SEPAS           | University of South Carolina |
| 40          | LS 5141         | Clovis              | Surface   | SCIAA/SEPAS           | University of South Carolina |
| 41          | LS 5137         | Haw River           | Surface   | SCIAA/SEPAS           | University of South Carolina |
| 42          | LS 5136         | Haw River           | Surface   | SCIAA/SEPAS           | University of South Carolina |
| 43          | LS (2018)       | Haw River           | Surface   | SCIAA/SEPAS           | University of South Carolina |
| 44          | P-77            | Clovis              | Surface   | SCIAA/SEPAS           | University of South Carolina |
| 45          | SC445           | Clovis              | Surface   | SCIAA/SEPAS           | University of South Carolina |
| 46          | P-7             | Redstone            | Surface   | SCIAA/SEPAS           | University of South Carolina |
| 47          | P-76            | Clovis              | Surface   | SCIAA/SEPAS           | University of South Carolina |
| 48          | P-15            | Clovis              | Surface   | SCIAA/SEPAS           | University of South Carolina |
| 49          | P-96            | Clovis              | Surface   | SCIAA/SEPAS           | University of South Carolina |
| 50          | SC382           | Clovis              | Surface   | SCIAA/SEPAS           | University of South Carolina |
| 51          | P-94            | Clovis              | Surface   | SCIAA/SEPAS           | University of South Carolina |
| 52          | SC641           | Clovis              | Surface   | SCIAA/SEPAS           | University of South Carolina |
| 53          | SC442           | Clovis              | Surface   | SCIAA/SEPAS           | University of South Carolina |
| 54          | SC444           | Clovis              | Surface   | SCIAA/SEPAS           | University of South Carolina |
| 55          | SC 450 or SC451 | Clovis              | Surface   | SCIAA/SEPAS           | University of South Carolina |
| 56          | P-80            | Clovis              | Surface   | SCIAA/SEPAS           | University of South Carolina |
| 57          | SC422           | Clovis              | Surface   | SCIAA/SEPAS           | University of South Carolina |
| 58          | P-95            | Clovis              | Surface   | SCIAA/SEPAS           | University of South Carolina |
| 59          | SC440           | Clovis              | Surface   | SCIAA/SEPAS           | University of South Carolina |
| 60          | P-79            | Clovis              | Surface   | SCIAA/SEPAS           | University of South Carolina |

**Supplementary Table 2 (cont).** Information on artifact context and ownership.

| Analysis ID | Artifact ID   | Type               | Context   | Owner/Curator                        | Type                               |
|-------------|---------------|--------------------|-----------|--------------------------------------|------------------------------------|
| 61          | S452          | Clovis             | Surface   | SCIAA/SEPAS                          | University of South Carolina       |
| 62          | P-81          | Clovis             | Surface   | SCIAA/SEPAS                          | University of South Carolina       |
| 63          | P-99          | Clovis             | Surface   | SCIAA/SEPAS                          | University of South Carolina       |
| 64          | AB#1          | Clovis             | Surface   | Anthony Bowen                        | Private Collection                 |
| 65          | AB#2          | Clovis             | Surface   | Anthony Bowen                        | Private Collection                 |
| 66          | AB#3          | Clovis             | Surface   | Anthony Bowen                        | Private Collection                 |
| 67          | AB#4          | Redstone           | Surface   | Anthony Bowen                        | Private Collection                 |
| 68          | AB#5          | Haw River          | Surface   | Anthony Bowen                        | Private Collection                 |
| 69          | AB#6          | Clovis             | Surface   | Anthony Bowen                        | Private Collection                 |
| 70          | SC359         | Redstone           | Surface   | Fort Jackson                         | Military Base                      |
| 71          | SC741         | Clovis             | Surface   | Fort Jackson                         | Military Base                      |
| 72          | SC287         | Cumberland         | Surface   | SCIAA/SEPAS                          | University of South Carolina       |
| 73          | SC782         | Haw River          | Surface   | SCIAA/SEPAS                          | University of South Carolina       |
| 74          | NC266         | Redstone           | Surface   | SCIAA/SEPAS                          | University of South Carolina       |
| 75          | Overstreet #9 | Clovis             | Surface   | John Kolmar                          | Private Collection                 |
| 76          | SC-632        | Clovis             | Surface   | Chris Young                          | Private Collection                 |
| 77          | RP-#103       | Clovis             | Surface   | Laurens County Museum                | Museum                             |
| 78          | SC388         | Clovis             | Surface   | Laurens County Museum                | Museum                             |
| 79          | 38LX283       | Redstone           | Excavated | SCDNR                                | SC Department of Natural Resources |
| 80          | 38RD18        | Clovis             | Surface   | SCDNR                                | SC Department of Natural Resources |
| 81          | Hendrix1      | Clovis             | Surface   | Dennis Hendrix                       | Private Collection                 |
| 82          | Hendrix2      | Clovis             | Surface   | Dennis Hendrix                       | Private Collection                 |
| 83          | Hendrix3      | Clovis             | Surface   | Dennis Hendrix                       | Private Collection                 |
| 84          | Hendrix4      | Clovis             | Surface   | Dennis Hendrix                       | Private Collection                 |
| 85          | Arena1        | Beaver Lake        | Surface   | John Arena                           | Private Collection                 |
| 86          | Arena2        | Clovis             | Surface   | John Arena                           | Private Collection                 |
| 87          | Arena3        | Quad               | Surface   | John Arena                           | Private Collection                 |
| 88          | Arena4        | Clovis             | Surface   | John Arena                           | Private Collection                 |
| 89          | Arena5        | Clovis             | Surface   | John Arena                           | Private Collection                 |
| 90          | Arena6        | Redstone           | Surface   | John Arena                           | Private Collection                 |
| 91          | NC186         | Clovis             | Surface   | Phelps Archaeology Laboratories, ECU | East Carolina University           |
| 92          | NC187         | Clovis             | Surface   | Phelps Archaeology Laboratories, ECU | East Carolina University           |
| 93          | NC303         | Redstone           | Surface   | Phelps Archaeology Laboratories, ECU | East Carolina University           |
| 94          | VS1           | Clovis             | Surface   | Steen Family                         | Private Collection                 |
| 95          | VS2           | Clovis             | Surface   | Steen Family                         | Private Collection                 |
| 96          | VS3           | Clovis             | Surface   | Steen Family                         | Private Collection                 |
| 97          | VS4           | Clovis             | Surface   | Steen Family                         | Private Collection                 |
| 98          | VS5           | Clovis             | Surface   | Steen Family                         | Private Collection                 |
| 99          | VS6           | Clovis             | Surface   | Steen Family                         | Private Collection                 |
| 100         | VS7           | Clovis             | Surface   | Steen Family                         | Private Collection                 |
| 101         | VS8           | Clovis             | Surface   | Steen Family                         | Private Collection                 |
| 102         | VS9           | Clovis             | Surface   | Steen Family                         | Private Collection                 |
| 103         | P-97          | Redstone           | Surface   | SCIAA/SEPAS                          | University of South Carolina       |
| 104         | SC750         | Clovis             | Surface   | SCIAA/SEPAS                          | University of South Carolina       |
| 105         | SC617         | Waisted Lanceolate | Surface   | SCIAA/SEPAS                          | University of South Carolina       |
| 106         | JL1           | Clovis             | Surface   | Jim Legg                             | Private Collection                 |
| 107         | JL2           | Redstone           | Surface   | Jim Legg                             | Private Collection                 |
| 108         | JL3           | Clovis             | Surface   | Jim Legg                             | Private Collection                 |
| 109         | LS 5197       | Haw River          | Surface   | SCIAA/SEPAS                          | University of South Carolina       |
| 110         | LS 5206       | Haw River          | Surface   | SCIAA/SEPAS                          | University of South Carolina       |
| 111         | LS 5213       | Haw River          | Surface   | SCIAA/SEPAS                          | University of South Carolina       |
| 112         | LS 5205       | Haw River          | Surface   | SCIAA/SEPAS                          | University of South Carolina       |
| 113         | LS 5215       | Haw River          | Surface   | SCIAA/SEPAS                          | University of South Carolina       |
| 114         | LS 5207       | Haw River          | Surface   | SCIAA/SEPAS                          | University of South Carolina       |
| 115         | LS 5210       | Haw River          | Surface   | SCIAA/SEPAS                          | University of South Carolina       |
| 116         | LS 5202       | Haw River          | Surface   | SCIAA/SEPAS                          | University of South Carolina       |
| 117         | LS 5199       | Haw River          | Surface   | SCIAA/SEPAS                          | University of South Carolina       |
| 118         | LS 5204       | Haw River          | Surface   | SCIAA/SEPAS                          | University of South Carolina       |
| 119         | LS5212        | Haw River          | Surface   | SCIAA/SEPAS                          | University of South Carolina       |
| 120         | BZ1           | Clovis Knife       | Surface   | Ben Ziegler                          | Private Collection                 |

**Supplementary Table 3.** Artifacts with Negative Immunological Results.

| <b>Analysis ID</b> | <b>Artifact ID</b> | <b>County/State</b> | <b>Type</b> | <b>Cultural Affiliation</b> | <b><sup>1</sup>Raw Material</b> | <b>CIEP Results</b> |
|--------------------|--------------------|---------------------|-------------|-----------------------------|---------------------------------|---------------------|
| 2                  | JC 7               | Hampton/SC          | Clovis      | Early Paleoindian           | CPC                             | Negative            |
| 3                  | JC 418             | Hampton/SC          | Simpson     | Middle Paleoindian          | CPC                             | Negative            |
| 5                  | JC 425             | Hampton/SC          | Clovis      | Early Paleoindian           | CPC                             | Negative            |
| 6                  | JC 9               | Hampton/SC          | Clovis      | Early Paleoindian           | CPC                             | Negative            |
| 7                  | JC 423             | Hampton/SC          | Clovis      | Early Paleoindian           | CPC                             | Negative            |
| 8                  | JC 420             | Hampton/SC          | Haw River   | Early Paleoindian           | CPC                             | Negative            |
| 9                  | JC 6               | Hampton/SC          | Redstone    | Middle Paleoindian          | CPC                             | Negative            |
| 10                 | JC 10              | Hampton/SC          | Clovis      | Early Paleoindian           | CPC                             | Negative            |
| 11                 | JC                 | Hampton/SC          | Clovis      | Early Paleoindian           | CPC                             | Negative            |
| 12                 | JC 417             | Hampton/SC          | Clovis      | Early Paleoindian           | CPC                             | Negative            |
| 13                 | JC 419             | Hampton/SC          | Haw River   | Early Paleoindian           | CPC                             | Negative            |
| 14                 | JC 422             | Hampton/SC          | Haw River   | Early Paleoindian           | CPC                             | Negative            |
| 15                 | JC 408             | Hampton/SC          | Haw River   | Early Paleoindian           | CPC                             | Negative            |
| 16                 | JC 407             | Hampton/SC          | Haw River   | Early Paleoindian           | CPC                             | Negative            |
| 17                 | JC 411             | Hampton/SC          | Haw River   | Early Paleoindian           | CPC                             | Negative            |
| 18                 | JC 406             | Hampton/SC          | Haw River   | Early Paleoindian           | CPC                             | Negative            |
| 19                 | JC 400             | Hampton/SC          | Haw River   | Early Paleoindian           | CPC                             | Negative            |
| 20                 | JC 404             | Hampton/SC          | Haw River   | Early Paleoindian           | CPC                             | Negative            |
| 21                 | JC 410             | Hampton/SC          | Haw River   | Early Paleoindian           | CPC                             | Negative            |
| 22                 | JC 402             | Hampton/SC          | Haw River   | Early Paleoindian           | CPC                             | Negative            |
| 23                 | JC 413             | Hampton/SC          | Haw River   | Early Paleoindian           | CPC                             | Negative            |
| 24                 | JC 401             | Hampton/SC          | Haw River   | Early Paleoindian           | CPC                             | Negative            |
| 25                 | JC 403             | Hampton/SC          | Haw River   | Early Paleoindian           | CPC                             | Negative            |
| 26                 | JC 405             | Hampton/SC          | Haw River   | Early Paleoindian           | CPC                             | Negative            |
| 30                 | SC680              | Allendale/SC        | Clovis      | Early Paleoindian           | CPC                             | Negative            |
| 31                 | SC682              | Allendale/SC        | Clovis      | Early Paleoindian           | CPC                             | Negative            |
| 32                 | SC679              | Allendale/SC        | Clovis      | Early Paleoindian           | CPC                             | Negative            |
| 33                 | SC358              | Allendale/SC        | Clovis      | Early Paleoindian           | CPC                             | Negative            |
| 34                 | SC681              | Allendale/SC        | Clovis      | Early Paleoindian           | CPC                             | Negative            |
| 35                 | SC547              | Allendale/SC        | Clovis      | Early Paleoindian           | MTV                             | Negative            |
| 36                 | SC670              | Allendale/SC        | Clovis      | Early Paleoindian           | CPC                             | Negative            |
| 39                 | SC488              | Allendale/SC        | Clovis      | Early Paleoindian           | CPC                             | Negative            |
| 40                 | LS 5141            | Allendale/SC        | Clovis      | Early Paleoindian           | CPC                             | Negative            |
| 41                 | LS 5137            | Allendale/SC        | Haw River   | Early Paleoindian           | CPC                             | Negative            |
| 42                 | LS 5136            | Allendale/SC        | Haw River   | Early Paleoindian           | CPC                             | Negative            |
| 43                 | LS (2018)          | Allendale/SC        | Haw River   | Early Paleoindian           | CPC                             | Negative            |
| 44                 | P-77               | McCormick/SC        | Clovis      | Early Paleoindian           | Ch                              | Negative            |
| 47                 | P-76/SC407         | Edgefield/SC        | Clovis      | Early Paleoindian           | CPC                             | Negative            |
| 48                 | P-15               | McCormick/SC        | Clovis      | Early Paleoindian           | CPC                             | Negative            |
| 49                 | P-96/SC385         | Edgefield/SC        | Clovis      | Early Paleoindian           | CPC                             | Negative            |
| 50                 | SC382              | Beaufort/SC         | Clovis      | Early Paleoindian           | Jas                             | Negative            |
| 51                 | P-94/SC442         | Lexington/SC        | Clovis      | Early Paleoindian           | Ch                              | Negative            |
| 53                 | SC442              | Lexington/SC        | Clovis      | Early Paleoindian           | Ch                              | Negative            |
| 55                 | SC450 or SC451     | Clarendon/SC        | Clovis      | Early Paleoindian           | BVT                             | Negative            |

<sup>1</sup>Raw Materials types include Coastal Plain Chert (CPC), Chert (Ch), Metavolcanic (MTV), Rhyolite (Rhy), Flow-Banded Rhyolite (FBR), Aphyric Rhyolite (AR), Plagioclase-Porphyrific Rhyolite (PPR), Quartz (Q), Crystal Quartz, (CQ), Green Vitric Tuff (GVT), Black Vitric Tuff (BVT), Jasper (Jas), and Black Mingo Chert (BMC).

**Supplementary Table 3 (cont).** Artifacts with Negative Immunological Results.

| Analysis ID | Artifact ID   | County/State   | Type               | Cultural Affiliation | <sup>1</sup> Raw Material | CIEP Results |
|-------------|---------------|----------------|--------------------|----------------------|---------------------------|--------------|
| 56          | P-80          | Sumter/SC      | Clovis             | Early Paleoindian    | CPC                       | Negative     |
| 57          | SC422         | Edgefield/SC   | Clovis             | Early Paleoindian    | MTV                       | Negative     |
| 58          | P-95          | Lake Marion/SC | Clovis             | Early Paleoindian    | CPC                       | Negative     |
| 60          | P-79/SC384    | Lake Marion/SC | Clovis             | Early Paleoindian    | CPC                       | Negative     |
| 62          | P-81/SC409    | Lake Marion    | Clovis             | Early Paleoindian    | Ch                        | Negative     |
| 63          | P-99/SC386    | Clarendon/SC   | Clovis             | Early Paleoindian    | CPC                       | Negative     |
| 64          | AB#1          | Darlington/SC  | Clovis             | Early Paleoindian    | MTV                       | Negative     |
| 65          | AB#2          | Darlington/SC  | Clovis             | Early Paleoindian    | GVT                       | Negative     |
| 67          | AB#4          | Darlington/SC  | Redstone           | Middle Paleoindian   | BVT                       | Negative     |
| 68          | AB#5          | Darlington/SC  | Haw River          | Early Paleoindian    | MTV                       | Negative     |
| 69          | AB#6          | Darlington/SC  | Clovis             | Early Paleoindian    | Chert                     | Negative     |
| 70          | SC359         | Richmond/SC    | Redstone           | Early Paleoindian    | AR                        | Negative     |
| 71          | SC741         | Richmond/SC    | Clovis             | Early Paleoindian    | Rhy                       | Negative     |
| 72          | SC287         | Lexington/SC   | Cumberland         | Middle Paleoindian   | Ch                        | Negative     |
| 73          | SC782         | Abbeville/SC   | Haw River          | Early Paleoindian    | MTV                       | Negative     |
| 75          | Overstreet #9 | Edgefield/SC   | Clovis             | Early Paleoindian    | CPC                       | Negative     |
| 76          | SC632         | Kershaw/SC     | Clovis             | Early Paleoindian    | MTV                       | Negative     |
| 77          | RP-#103       | Surry/NC       | Clovis             | Early Paleoindian    | Jas                       | Negative     |
| 78          | SC388         | Lexington/SC   | Clovis             | Early Paleoindian    | CPC                       | Negative     |
| 79          | 38LX283       | Lexington/SC   | Redstone           | Middle Paleoindian   | Ch                        | Negative     |
| 81          | Hendrix1      | Jasper/SC      | Clovis             | Early Paleoindian    | CPC                       | Negative     |
| 82          | Hendrix2      | Orangeburg/SC  | Clovis             | Early Paleoindian    | CPC                       | Negative     |
| 83          | Hendrix3      | Orangeburg/SC  | Clovis             | Early Paleoindian    | CPC                       | Negative     |
| 84          | Hendrix4      | Bamburg/SC     | Clovis             | Early Paleoindian    | CPC                       | Negative     |
| 86          | Arena2        | Edgefield/SC   | Clovis             | Early Paleoindian    | CPC                       | Negative     |
| 87          | Arena3        | Aiken/SC       | Quad               | Middle Paleoindian   | Ch                        | Negative     |
| 88          | Arena4        | Saluda/SC      | Clovis             | Early Paleoindian    | Jas                       | Negative     |
| 89          | Arena5        | Burke/GA       | Clovis             | Early Paleoindian    | CPC                       | Negative     |
| 90          | Arena6        | Edgefield/SC   | Redstone           | Middle Paleoindian   | Ch                        | Negative     |
| 91          | NC186         | Durham/NC      | Clovis             | Early Paleoindian    | Rhy                       | Negative     |
| 92          | NC187         | Randolph/NC    | Clovis             | Early Paleoindian    | Rhy                       | Negative     |
| 95          | VS2           | Kershaw/SC     | Clovis             | Early Paleoindian    | CQ                        | Negative     |
| 96          | VS3           | Kershaw/SC     | Clovis             | Early Paleoindian    | CQ                        | Negative     |
| 97          | VS4           | Lancaster/SC   | Clovis             | Early Paleoindian    | MTV                       | Negative     |
| 98          | VS5           | Lancaster/SC   | Clovis             | Early Paleoindian    | MTV                       | Negative     |
| 99          | VS6           | Lancaster/SC   | Clovis             | Early Paleoindian    | MTV                       | Negative     |
| 100         | VS7           | Lancaster/SC   | Clovis             | Early Paleoindian    | CQ                        | Negative     |
| 102         | VS9           | Kershaw/SC     | Clovis             | Early Paleoindian    | MTV                       | Negative     |
| 103         | P-97/SC443    | McCormick/SC   | Redstone           | Middle Paleoindian   | CPC                       | Negative     |
| 104         | SC750         | Cherokee/SC    | Clovis             | Early Paleoindian    | FBR                       | Negative     |
| 105         | SC617         | Bamburg/SC     | Waisted Lanceolate | Middle Paleoindian   | CPC                       | Negative     |
| 107         | JL2           | Cumberland/NC  | Redstone           | Middle Paleoindian   | Ch                        | Negative     |
| 108         | JL3           | Charleston/SC  | Clovis             | Early Paleoindian    | CPC                       | Negative     |
| 110         | LS 5206       | Allendale/SC   | Haw River          | Early Paleoindian    | CPC                       | Negative     |
| 111         | LS 5213       | Allendale/SC   | Haw River          | Early Paleoindian    | CPC                       | Negative     |
| 112         | LS 5205       | Allendale/SC   | Haw River          | Early Paleoindian    | CPC                       | Negative     |
| 113         | LS 5215       | Allendale/SC   | Haw River          | Early Paleoindian    | CPC                       | Negative     |
| 115         | LS 5210       | Allendale/SC   | Haw River          | Early Paleoindian    | CPC                       | Negative     |
| 116         | LS 5202       | Allendale/SC   | Haw River          | Early Paleoindian    | CPC                       | Negative     |
| 118         | LS 5204       | Allendale/SC   | Haw River          | Early Paleoindian    | CPC                       | Negative     |
| 119         | LS 5212       | Allendale/SC   | Haw River          | Early Paleoindian    | CPC                       | Negative     |

<sup>1</sup>Raw Materials types include Coastal Plain Chert (CPC), Chert (Ch), Metavolcanic (MTV), Rhyolite (Rhy), Flow-Banded Rhyolite (FBR), Aphyric Rhyolite (AR), Plagioclase-Porphyrific Rhyolite (PPR), Quartz (Q), Crystal Quartz, (CQ), Green Vitric Tuff (GVT), Black Vitric Tuff (BVT), Jasper (Jas), and Black Mingo Chert (BMC).

## Supplementary Figures

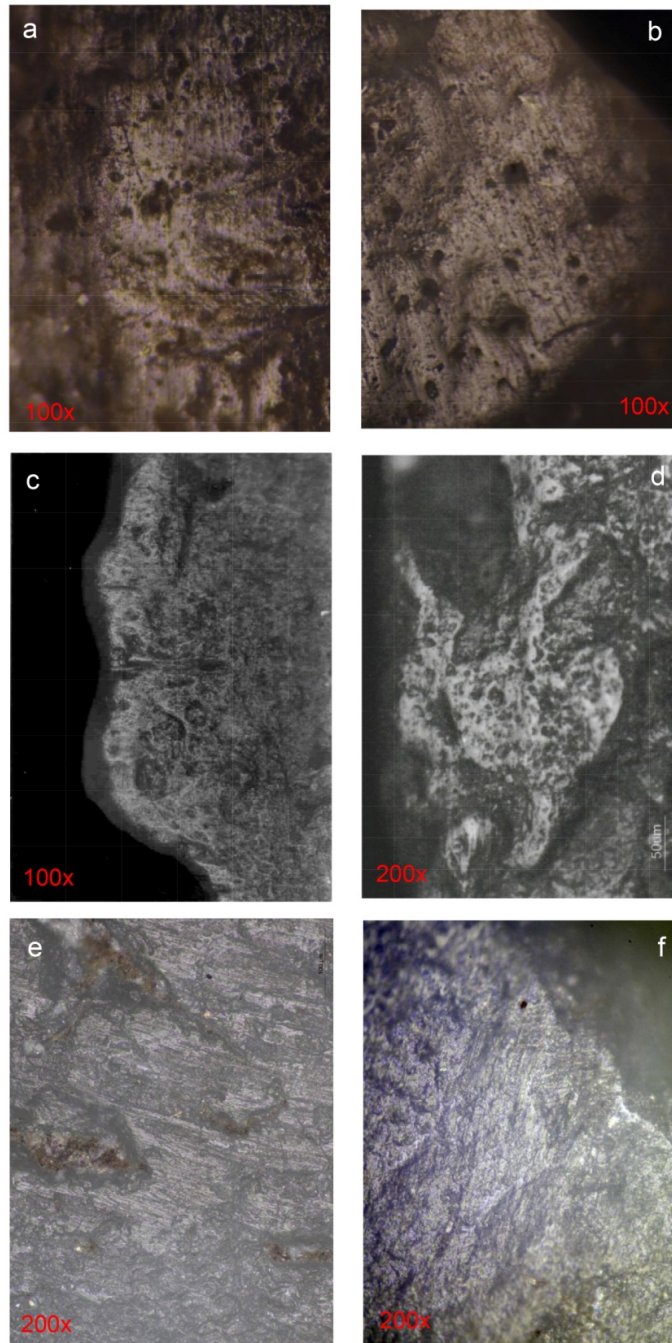

**Supplementary Figure 1.** Sheath Polish: (a-b) Clovis Knife-120 ST3f-3a; (c) experimental dry hide polish (Kimball<sup>33</sup>:Fig. A38); (d) Neolithic dagger (van Gijn<sup>34</sup>:Fig. 7.11b); (e) Neolithic dagger (van Gijn<sup>35</sup>:Fig. 6.4C); and Dalton point/knife 551.1 (Kimball<sup>36</sup>: Figure 5).

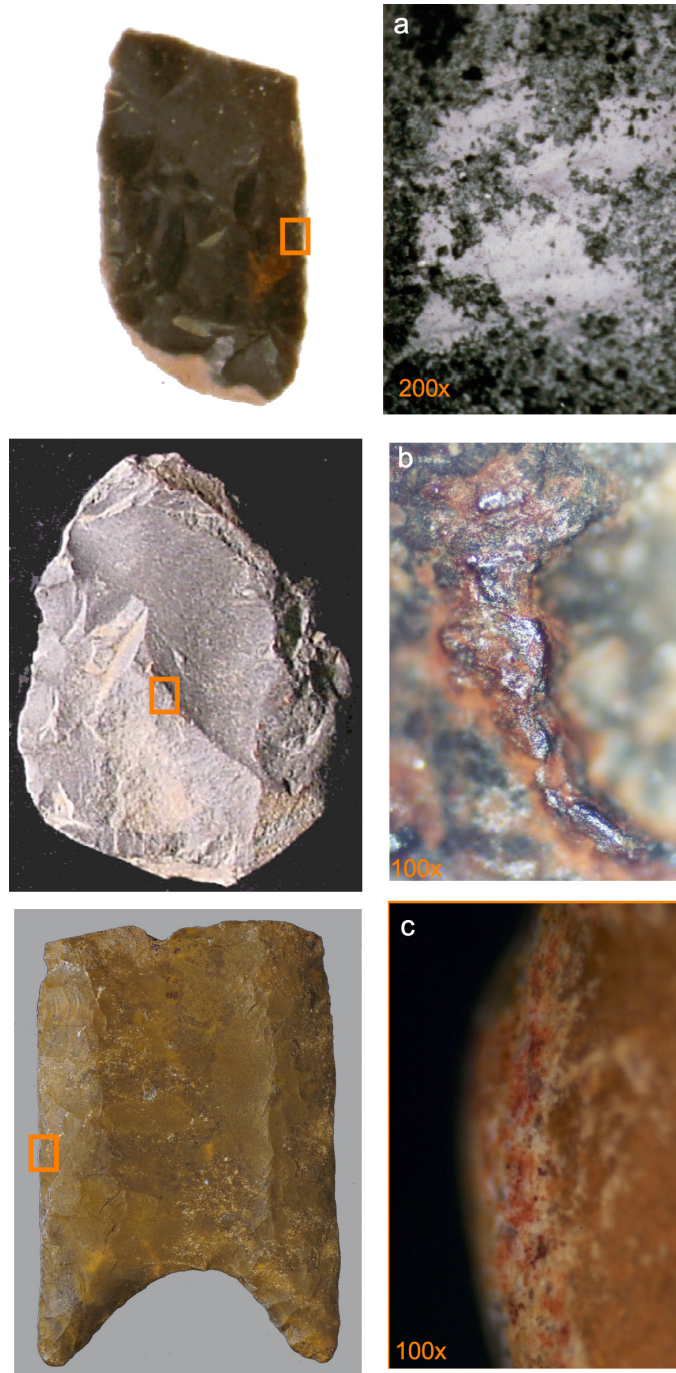

**Supplementary Figure 2.** Ochred Dry Hide Hafting Polish: (a) Early Archaic bifacial knife I-13 (note patch of ochre) from Main site, KY (Kimball<sup>37</sup>:Figure F-34); (b) Bifacial knife-3402 - 36PE45 PA (Kimball<sup>38</sup>:Plate 24); (c) Clovis 74 (Figure 15 in the main paper).

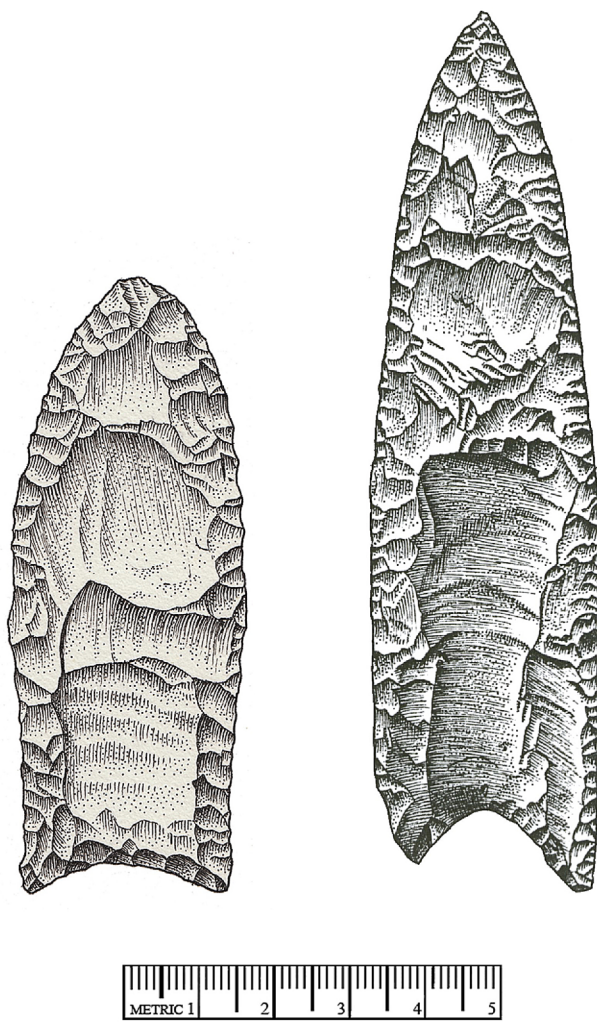

**Supplementary Figure 3.** Comparison of Clovis (left) and Redstone (right). Drawing by Darby Erd.

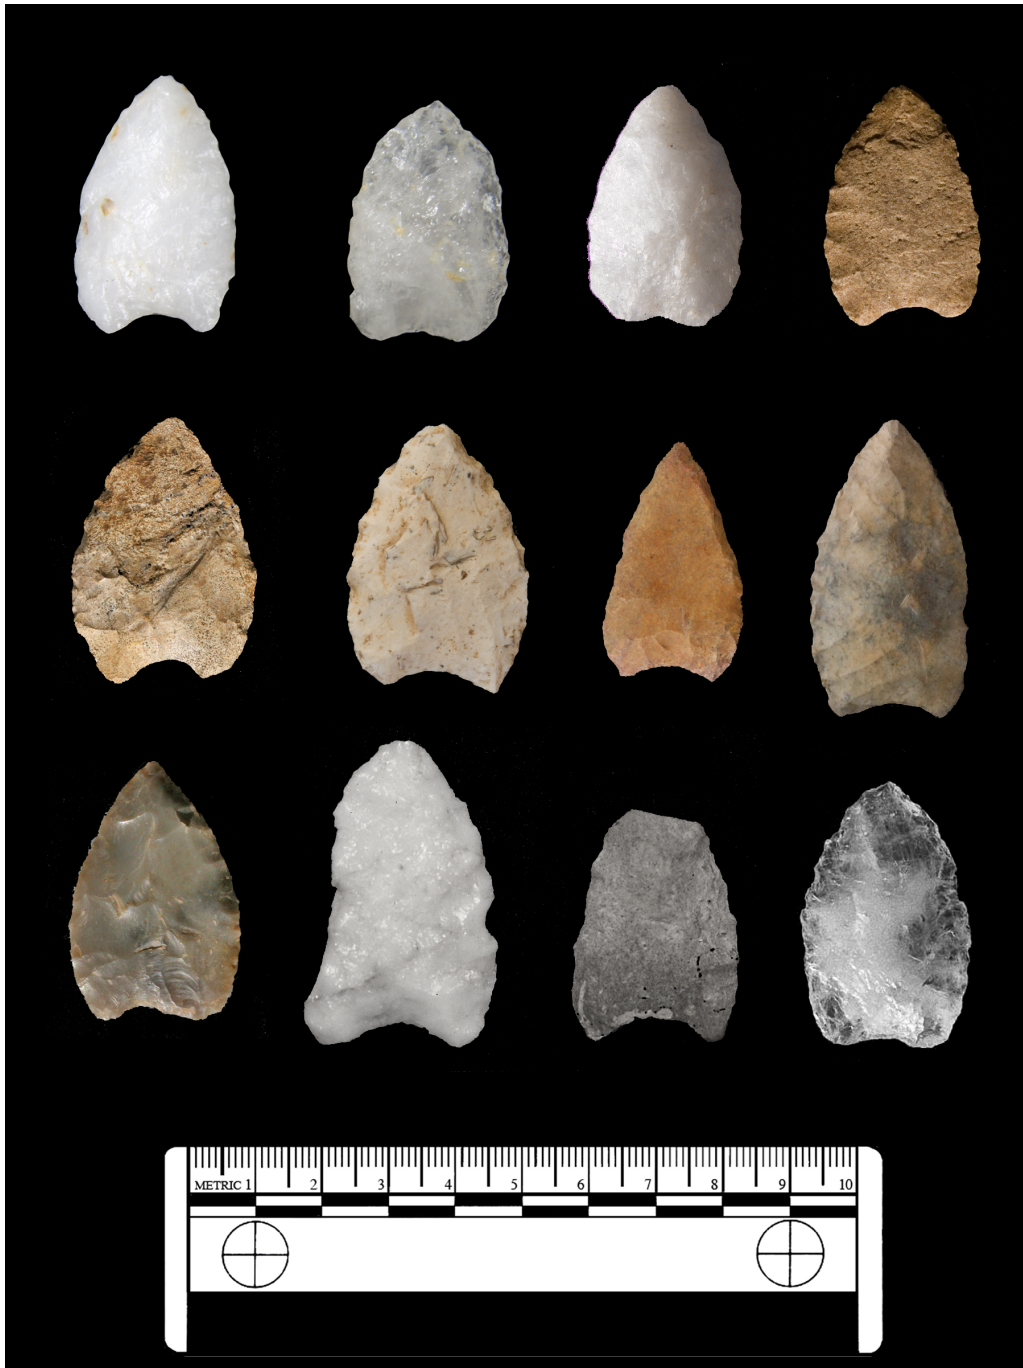

**Supplementary Figure 4.** Examples of Haw River points (formerly described as “Heart Points”) from South Carolina (Charles and Moore <sup>10</sup>).



## References

1. Marlar, R. A. Puseman, K. and Linda Scott Cummings, Protein Residue Analysis of Archaeological Materials: Some Comments on Criticisms and Methods. *Southwestern Lore* **61**(2):27-37 (1995).
2. Forgeng, E. Blood Residue Analysis of Seven Crescents from Sonoma County, California. Archaeological Investigations Northwest, Inc. Residue Analysis Report No. 97/399 . Report to the Anthropological Studies Center, Sonoma State University (1998).
3. Loy, T. and James E. J. Dixon Blood Residues on Fluted Points from Eastern Beringea. *American Antiquity* **63**(1):21-46 (1998).
4. Williams, S. B. Blood residue Analysis of a Clovis Point from the Needles, California Resource Area. Archaeological Investigations Northwest, Inc. Residue Analysis Laboratory Letter Report No. 93/144. Prepared for the USDI Bureau of Land Management, Needles, California (1993).
5. Prager, E. M., Wilson, A. C. Lowenstein, J. M. and Sarich V. M. Mammoth Albumin. *Science* 209:287-289 (1980)
6. Dorrill, M., and Whitehead, P. H. The Species Identification of Very Old Human Bloodstains. *Forensic Science International* **13**:111-116 (1979).
7. Kind, S. S., and Cleevy R. The Use of Ammoniacal Bloodstain Extracts in ABO Groupings. *Journal of Forensic Sciences* **9**:131-139 (1969).
8. Newman, M. E. The Hidden Evidence from Hidden Cave, Nevada: An Application of Immunological Techniques to the Analysis of Archaeological Materials. Ph.D. Dissertation, Department of Anthropology, University of Toronto, Ontario, Canada (1990).

9. Culliford, B. J. *The Examination and Typing of Bloodstains in the Crime Laboratory*. National Institution of Law Enforcement and Criminal Justice, U.S. Printing Office, Washington, D.C (1971).
10. Charles, T. and Moore, C. R. *Prehistoric Chipped Stone Tools of South Carolina*. Piedmont Archaeological Studies Trust (P.A.S.T). Piedmont Archaeological Studies Trust Inc., Glendale, South Carolina (2018).
11. Coe, J. L. *The Formative Cultures of the Carolina Piedmont*. Transactions of the American Philosophical Society Vol. 54, Part 5. The American Philosophical Society, Independence Square, Philadelphia (1964).
12. Goodyear, A. C. *The Brand Site: A Techno-Functional Study of a Dalton Site in Northeast Arkansas*. Arkansas Archaeological Survey, Research Series 7. Fayetteville (1974).
13. Daniel, I. R., Jr. *Time, Typology, and Point Traditions in North Carolina Archaeology: Formative Cultures Reconsidered*. The University of Alabama Press, Tuscaloosa (2021).
14. Adovasio, J. M. *et al.* No Vestige of a Beginning nor Prospect for an End: Two Decades of Debate on Meadowcroft. In *Ice Age Peoples of North America: Environments, Origins, and Adaptations of the First Americans*, edited by Robson Bonnichsen and Karen. L. Turnmire, pp. 416–431. Oregon State University Press, Corvallis (1999).
15. McAvoy, J. M., and McAvoy, L. D. *Archaeological Investigations of Site 44SX202, Cactus Hill, Sussex County, Virginia*. Research Report Series No. 8. Virginia Department of Historic Resources, Richmond, Virginia (1997).
16. Painter, F. One Man's Trash is Another Man's Treasure: A Study in Discarded Tools and Weapons. *The Chesopiean* **20**, Nos. 5-6, pp.17-37. (Haw River type description on p. 19). Published by The Chesopiean Archaeological Association (1982).

17. Painter, F. Two Basic Paleoindian Lithic Traditions Evolving from a Southeastern Hearth (A Revolutionary Idea). *Archaeology of Eastern North America* **11**:65-79 (1983).
18. Gingerich, J. A. M. and Childress, W. A. Evolving Perspectives on Virginia's Paleoindian Record. In *The American Southeast at the End of the Ice Age*, pp 171-112, edited by D. Shane Miller, Ashley M. Smallwood and Jesse W. Tune. The University of Alabama Press, Tuscaloosa (2022).
19. Whatley, J. S. and Arena, J. W. Jr. An Overview of Georgia Projectile Points and Selected Cutting Tools, Second Edition. The Archaeological Society of South Carolina (2021).
20. Goodyear, A. C., III. , Instrument-Assisted Fluting as a Technochronological Marker Among North American Paleoindian Points. *Current Research in the Pleistocene* **27**:86–88 (2010).
21. Cambron, J. W., and Hulse, D. C. *Handbook of Alabama Archaeology, Point Types Part I* (1964).
22. Smallwood, A. M., and T. A. Jennings, (editors) Clovis: On the Edge of a New Understanding. Texas A&M University Press, College Station (2015).
23. Morrow, J. E. Clovis-era Lithic Technology in the Midcontinent by Juliet E. Morrow. In *Clovis: On the Edge of a New Understanding*, edited by Ashley M. Smallwood and Thomas A. Jennings, pp. 83-108. Texas A&M University Press, College Station (2015).
24. Brooster, J. B. and Norton, M. R. The Tennessee Fluted Point Survey PIDBA database (2005).
25. Goodyear, A. C., III. Recognizing the Redstone Fluted Point in the South Carolina Paleoindian Point Database. *Current Research in the Pleistocene* **23**:100–103 (2006).
26. McAvoy, J. M., and McAvoy, L. D. Cactus Hill and Other Excavated Sites. Nottoway River Survey *Research Report No. 5* (2005).

27. Tune, J. W. The Clovis-Cumberland-Dalton Succession: Settling into the Midsouth United States during the Pleistocene to Holocene Transition. *PaleoAmerica* 2: 261–273 (2016).
28. Bullen, R. A Guide to the Identification of Florida Projectile points, Revised edition. Kendall, Books T.M., Gainesville, Florida (1975).
29. Meeks, S. C., and Anderson, D. G. Evaluating the Effect of the Younger Dryas on Human Population Histories in the Southeastern United States. In *Hunter-Gatherer Behavior Human Response During The Younger Dryas*, edited by Metin I. Eren, pp. 111–138. Left Coast Press, Walnut Creek, California (2015).
30. Dunbar, J. S. *Paleoindian Societies of the Coastal Southeast*. 1st ed., University Press of Florida. *JSTOR*, <https://doi.org/10.2307/j.ctvx06zz3> (2016).
31. DeJarnette, D. L., Kurjack, E. and Cambron, J. W. Stanfield-Worley Bluff Shelter Excavations. *Journal of Alabama Archaeology* 8, Nos. 1 and 2. Alabama Archaeological Society, University Alabama (1962).
32. Soday, Frank J. and Cambron, J. W. A survey of Paleoindian sites and artifacts in the Tennessee River Valley (1959).
33. Kimball, L. R. *Planning and functional variability in the Upper Palaeolithic: Microwear analysis of Upper Perigordian tools from Le Flageolet I (Dordogne)*. Ph.D. dissertation. Northwestern University (1989).
34. van Gijn, A.L. *Flint in focus: Lithic biographies in the Neolithic and Bronze Age*. Sidestone Press, Leiden (2010).
35. van Gijn, A. L. The cultural biography of the Scandinavian daggers in the northern Netherlands. In *Flint daggers in prehistoric Europe*, edited by C.J. Frieman and B.V. Eriksen, pp. 76-82. Oxbow Books, Oxford (2015).

36. Kimball, L. R. *Microwear analysis of lithic tools from 11PK1771, Pike County, Illinois*. Technical Report submitted to URS Corporation, Burlington, New Jersey (2009).

37. Kimball, L. R. Microwear analysis of Archaic and Early Woodland tools from the Main site (15BL35), Kentucky. In *Upper Cumberland Archaic and Woodland Period at the Main site (15BL35), Bell County, Kentucky*, by S.D. Creasman, Appendix F. Report by Cultural Resource Analysts, Inc. to the KDOT and USCOE (1994b).

38. Kimball, L.R. Microwear analysis of Archaic tools from 36Pe45 Pennsylvania. In *Archaeological Investigations, Route 11/15 Improvements (SR0011, Section 005), Juniata and Perry Counties, Pennsylvania*, by P.E. Miller, N. Sheehan, and J.T. Marine. Report submitted to the Pennsylvania Department of Transportation, Engineering District 8-0, Harrisburg, PA (2005).
